# Supplementary material
Source: Springer Nature journal article supplement (https://www.springermedizin.de/resource/supplementary/12875_2011_715_MOESM2_ESM.pdf/9435270)
Supplement: MOESM2 [file 9435270]

## Appendix 2. Unmet needs for care section items.

| Item   | Introduction                                                                                        | Question                                                                                                   | Response categories                                                                                                                                                                                                                                |
|--------|-----------------------------------------------------------------------------------------------------|------------------------------------------------------------------------------------------------------------|----------------------------------------------------------------------------------------------------------------------------------------------------------------------------------------------------------------------------------------------------|
| Q_D1   | The next questions are about the health services you needed and did not get.                        | During the last 6 months, did you feel you needed to see a doctor for a health problem but didn't see one? | 1=Yes<br>2=No<br>95=Does not know<br>97=Refused                                                                                                                                                                                                    |
| Q_D2   | For what reason did you want to see a doctor?                                                       | Was it...                                                                                                  | 1=For an urgent health problem<br>2=For a non urgent health problem<br>3=To pass routine exams<br>5=To receive results from tests or exams, or from a consultation to a specialist<br>7=To have a form filled out<br>90=Other reason<br>97=Refused |
| Q_D2.1 | Was this a known problem or was it a new problem ?                                                  |                                                                                                            | 1=Known problem<br>2=New problem<br>97=Refused                                                                                                                                                                                                     |
| Q_D3   | Do you still have this problem?                                                                     |                                                                                                            | 1=Yes<br>2=No<br>95=Does not know<br>96=DNA<br>97=Refused                                                                                                                                                                                          |
| Q_D4   | Tell me if the following questions apply a lot, moderately, slightly or not at all.?                | Was this problem causing you pain?                                                                         | 1=A lot<br>2=Moderately                                                                                                                                                                                                                            |
| Q_D5   |                                                                                                     | Was this problem threatening your health?                                                                  | 3=Slightly                                                                                                                                                                                                                                         |
| Q_D6   |                                                                                                     | Were you afraid of having complications if this problem was not treated quickly ?                          | 4=Not at all                                                                                                                                                                                                                                       |
| Q_D7   |                                                                                                     | Was the problem for which you wanted to consult limiting your activities?                                  | 95=Does not know<br>96=DNA<br>97=Refused                                                                                                                                                                                                           |
| Q_D8   | What were the reasons you did not see a doctor? Was it because...                                   | You received an appointment but have not seen the doctor yet.                                              | 1=Yes<br>2=No<br>95=Does not know<br>96=DNA<br>97=Refused                                                                                                                                                                                          |
| Q_D9   |                                                                                                     | You didn't know where to go to see a doctor.                                                               |                                                                                                                                                                                                                                                    |
| Q_D10  |                                                                                                     | You couldn't get an appointment.                                                                           |                                                                                                                                                                                                                                                    |
| Q_D11  |                                                                                                     | You couldn't move around to actually go see a doctor.                                                      |                                                                                                                                                                                                                                                    |
| Q_D12  |                                                                                                     | You couldn't find a doctor who is taking new patients.                                                     |                                                                                                                                                                                                                                                    |
| Q_D13  |                                                                                                     | Your usual doctor wasn't available at the time you needed him or her.                                      |                                                                                                                                                                                                                                                    |
| Q_D14  |                                                                                                     | The waiting time before seeing a doctor was too long.                                                      |                                                                                                                                                                                                                                                    |
| Q_D15  |                                                                                                     | The office hours during which you could see a doctor did not suit you.                                     |                                                                                                                                                                                                                                                    |
| Q_D19  |                                                                                                     | Your health status deteriorated too much so that you could not go see your doctor.                         |                                                                                                                                                                                                                                                    |
| Q_D20  |                                                                                                     | Your health has worsened.                                                                                  |                                                                                                                                                                                                                                                    |
| Q_D21  |                                                                                                     | This situation caused you to feel worried, stressed or anxious.                                            |                                                                                                                                                                                                                                                    |
| Q_D22  | This situation caused some of your family members and friends to feel worried, stressed or anxious. | 1=Strongly<br>2=Somewhat<br>3=A little<br>4=Not at all<br>95=Does not know/<br>97=Refused                  |                                                                                                                                                                                                                                                    |
| Q_D23  | You were bothered by the pain.                                                                      |                                                                                                            |                                                                                                                                                                                                                                                    |
| Q_D24  | You had difficulty doing your daily activities.                                                     |                                                                                                            |                                                                                                                                                                                                                                                    |
| Q_D25  | This situation had negative consequences on other aspects of your life.                             |                                                                                                            |                                                                                                                                                                                                                                                    |
| Q_D26  | You lost some income.                                                                               |                                                                                                            |                                                                                                                                                                                                                                                    |
| Q_D27  | This situation made you dependent on family members or friends.                                     |                                                                                                            |                                                                                                                                                                                                                                                    |
| Q_D28  | You still have not succeeded in managing your health problem.                                       |                                                                                                            |                                                                                                                                                                                                                                                    |
